# Supplementary material for: Alexithymia and facial emotion recognition in patients with craniofacial pain and association of alexithymia with anxiety and depression: a systematic review with meta-analysis
Source: PeerJ. 2021 Nov 29;9:e12545. doi: 10.7717/peerj.12545 (PMC8638568; doi:10.7717/peerj.12545)
Supplement: Supplemental Information 5 [file peerj-09-12545-s005.xlsx]

## Sheet: TAS-20 MA
TAS-20 Meta-analysis
Author	Year	Comparison	Mean_Exp	Sd_Exp	n_Exp	Mean_Cont	Sd_Cont	n_Cont
Cerutti et al.	2016	Migraine-CG	55.26	12.54	53	50.86	14.53	53
Galli et al. a	2017	Chro migraine-CG	48.94	13.44	80	42.19	10.23	67
Galli et al. b	2017	Epis migraine-CG	46.87	13.99	44	42.19	10.23	67
Glaros et al.	2005	TMD-CG	45.59	11.36	49	42.65	9.64	52
Haas et al.	2013	TMD-CG	44.65	10.31	20	35.9	6.74	20
Muftouglu et al.	2004	Migraine-CG	12.2	3.2	50	9.4	0.5	50
Shim et al. a	2018	Migraine-CG	49	10.5	91	45.3	11.14	124
Shim et al. b	2018	TTH-CG	54.2	10.75	32	45.3	11.14	124
Vieira et al.	2013	Migraine-CG	63.72	8.3	40	53.21	9.49	33
Yalinay et al. a	2017	Inf migraine-CG	42.4	9.8	55	47.1	11.3	50
Yalinay et al. b	2017	Freq migraine-CG	47.4	10.4	40	47.1	11.3	50
Yalinay et al. c	2017	Chro migraine-CG	45.8	9.1	50	47.1	11.3	50
Yücel et al.	2002	TTH-CG	11	4.2	105	8.22	3.69	70

## Sheet: TAS-DDF MA
TAS-DDF Meta-analysis
Author	Year	Comparison	Mean_Exp	Sd_Exp	n_Exp	Mean_Cont	Sd_Cont	n_Cont
Glaros et al.	2005	TMD-CG	11.78	4.22	49	10.63	3.57	52
Galli et al. a	2017	Chro migraine-CG	12.96	4.29	80	12.13	3.83	67
Galli et al. b	2017	Epis migraine-CG	12.58	5.33	44	12.13	3.83	67
Shim et al. a	2018	Migraine-CG	12.7	3.82	91	11.8	4.46	124
Shim et al. b	2018	TTH-CG	14.3	3.96	32	11.8	4.46	124
Yalinay et al. a	2017	Inf migraine-CG	10	3.1	55	12	6.1	50
Yalinay et al. b	2017	Freq migraine-CG	11.7	3.9	40	12	6.1	50
Yalinay et al. c	2017	Chro migraine-CG	11.3	3.4	50	12	6.1	50
Vieira et al.	2013	Migraine-CG	19.3	5.46	40	16.09	4.57	33
Cerutti et al	2016	Migraine-CG	12.75	4.03	53	12.28	4.61	53

## Sheet: TAS-DIF MA
TAS-DIF Meta-analysis
Author	Year	Comparison	Mean_Exp	Sd_Exp	n_Exp	Mean_Cont	Sd_Cont	n_Cont
Cerutti et al.	2016	Migraine-CG	16.09	5.52	53	13.45	5.78	53
Galli et al. a	2017	Chro migraine-CG	17.77	7.59	80	13.25	4.98	67
Galli et al. b	2017	Epis migraine-CG	15.91	7.8	44	13.25	4.98	67
Glaros et al.	2005	TMD-CG	15.59	6.27	49	12.25	4.68	52
Shim et al. a	2018	Migraine-CG	15	5.73	91	13.1	5.57	124
Shim et al. b	2018	TTH-CG	17.07	6.23	32	13.1	5.57	124
Vieira et al.	2013	Migraine-CG	32.28	7.82	40	26.3	7.7	33
Yalinay et al. a	2017	Inf migraine-CG	12.1	4.5	55	13.5	5.1	50
Yalinay et al. b	2017	Freq migraine-CG	14.6	5.6	40	13.5	5.1	50
Yalinay et al. c	2017	Chro migraine-CG	13.7	5.1	50	13.5	5.1	50

## Sheet: TAS-EOT MA
TAS-EOT Meta-analysis
TAS-EOT Meta-analysis
Author	Year	Comparison	Mean_Exp	Sd_Exp	n_Exp	Mean_Cont	Sd_Cont	n_Cont
Glaros et al.	2005	TMD-CG	18.22	3.98	49	19.78	3.61	52
Galli et al. a	2017	Chro migraine-CG	18.2	5.4	80	16.81	5.14	67
Galli et al. b	2017	Epis migraine-CG	18.38	4.63	44	16.81	5.14	67
Shim et al. a	2018	Migraine-CG	21.2	3.82	91	20.5	3.35	124
Shim et al. b	2018	TTH-CG	22.7	3.96	32	20.5	3.35	124
Yalinay et al. a	2017	Inf migraine-CG	20.3	4.2	55	21.5	3.7	50
Yalinay et al. b	2017	Freq migraine-CG	21.2	3.1	40	21.5	3.7	50
Yalinay et al. c	2017	Chro migraine-CG	20.8	4.1	50	21.5	3.7	50
Vieira et al.	2013	Migraine-CG	12.15	2.52	40	10.82	2.2	33
Cerutti et al	2016	Migraine-CG	26.41	5.55	53	25.13	7	53

## Sheet: Alex-Anxie MA Corr
Meta-analysis correlation between alexithymia and anxiety
Author		Year	n	r	Fz	VarFz	SdFz	LowLimFz	UppLimFz	rback	LowLimrback	UppLimrback
Shim et al.		2019	123	0.658	0.789278	0.00833333	0.0912871	0.610356	0.968201	0.658	0.544377	0.747913
Yalinay et al. a	DIF	2017	145	0.473	0.513928	0.00704225	0.0839181	0.349448	0.678407	0.473	0.335886	0.590483
Yalinay et al. b	DDF	2017	145	0.398	0.42127	0.00704225	0.0839181	0.256791	0.58575	0.398	0.251291	0.526832
Yalinay et al. c	EOT	2017	145	0.22	0.223656	0.00704225	0.0839181	0.0591766	0.388136	0.22	0.0591076	0.369752
Vieira et al. a	DIF	2013	40	0.41	0.435611	0.027027	0.164399	0.113389	0.757833	0.41	0.112906	0.639799
Vieira et al. b	DDF	2013	40	-0.23	-0.234189	0.027027	0.164399	-0.556411	0.0880325	-0.23	-0.50531	0.0878058
Vieira et al. c	EOT	2013	40	-0.04	-0.0400214	0.027027	0.164399	-0.362243	0.282201	-0.04	-0.347189	0.274941

## Sheet: Alex-Depress
Meta-analysis correlation between alexithymia and depression
Author		Year	n	r	Fz	VarFz	SdFz	LowLimFz	UppLimFz	rback	LowLimrback	UppLimrback
Glaros et al. a	DIF	2005	49	0.7	0.867301	0.0217391	0.147442	0.578314	1.15629	0.7	0.521439	0.819826
Glaros et al. b	DDF	2005	49	0.35	0.365444	0.0217391	0.147442	0.0764575	0.65443	0.35	0.0763089	0.574645
Glaros et al. c	EOT	2005	49	-0.01	-0.0100003	0.0217391	0.147442	-0.298987	0.278986	-0.01	-0.290385	0.271966
Shim et al.		2018	123	0.636	0.751428	0.00833333	0.0912871	0.572505	0.930351	0.636	0.517197	0.730757
Yalinay et al. a	DIF	2017	145	0.473	0.513928	0.00704225	0.0839181	0.349448	0.678407	0.473	0.335886	0.590483
Yalinay et al. b	DDF	2017	145	0.451	0.485955	0.00704225	0.0839181	0.321475	0.650434	0.451	0.31084	0.571962
Yalinay et al. c	EOT	2017	145	0.302	0.311719	0.00704225	0.0839181	0.147239	0.476198	0.302	0.146184	0.443194
Vieira et al. a	DIF	2013	40	0.4	0.423649	0.027027	0.164399	0.101427	0.745871	0.4	0.101081	0.632679
Vieira et al. b	DDF	2013	40	0.01	0.0100003	0.027027	0.164399	-0.312222	0.332222	0.01	-0.302457	0.320516
Vieira et al. c	EOT	2013	40	0.06	0.0600722	0.027027	0.164399	-0.26215	0.382294	0.06	-0.256305	0.364698

## Sheet: Meta-regression Alex-Anxi
Meta-regression between alexithymia and anxiety
Author	Year	Comparison	Mean_Exp	Sd_Exp	n_Exp	Mean_Cont	Sd_Cont	n_Cont	Ans_Glob_Norm
Cerutti et al	2016	Migraine-CG	16.09	5.52	53	13.45	5.78	53	13.6538
Shim et al. a	2018	Migraine-CG	15	5.73	91	13.1	5.57	124	26.8682
Shim et al. b	2018	TTH-CG	17.07	6.23	32	13.1	5.57	124	24.6629
Vieira et al.	2013	Migraine-CG	32.28	7.82	40	26.3	7.7	33	21.5947
Yalinay et al. a	2017	Inf migraine-CG	12.1	4.5	55	13.5	5.1	50	16.1527
Yalinay et al. b	2017	Freq migraine-CG	14.6	5.6	40	13.5	5.1	50	16.2787
Yalinay et al. c	2017	Chro migraine-CG	13.7	5.1	50	13.5	5.1	50	15.5556

## Sheet: Meta-regression Alex-Depress
Meta-regression between alexithymia and depression
Author	Year	Comparison	Mean_Exp	Sd_Exp	n_Exp	Mean_Cont	Sd_Cont	n_Cont	Dep_Glob_Norm
Cerutti et al	2016	Migraine-CG	16.09	5.52	53	13.45	5.78	53	18.0962
Glaros et al.	2005	TMD-CG	15.59	6.27	49	12.25	4.68	52	1.2719
Shim et al. a	2018	Migraine-CG	15	5.73	91	13.1	5.57	124	24.2894
Shim et al. b	2018	TTH-CG	17.07	6.23	32	13.1	5.57	124	22.7255
Vieira et al.	2013	Migraine-CG	32.28	7.82	40	26.3	7.7	33	20.5021
Yalinay et al. a	2017	Inf migraine-CG	12.1	4.5	55	13.5	5.1	50	11.4588
Yalinay et al. b	2017	Freq migraine-CG	14.6	5.6	40	13.5	5.1	50	13.3333
Yalinay et al. c	2017	Chro migraine-CG	13.7	5.1	50	13.5	5.1	50	15.873
